# Supplementary material for: Characterization of hemolymph phenoloxidase activity in two Biomphalaria snail species and impact of Schistosoma mansoni infection
Source: PubMed Central journal article supplement (PMC4722754; doi:10.1186/s13071-016-1319-6), 2016-01-22

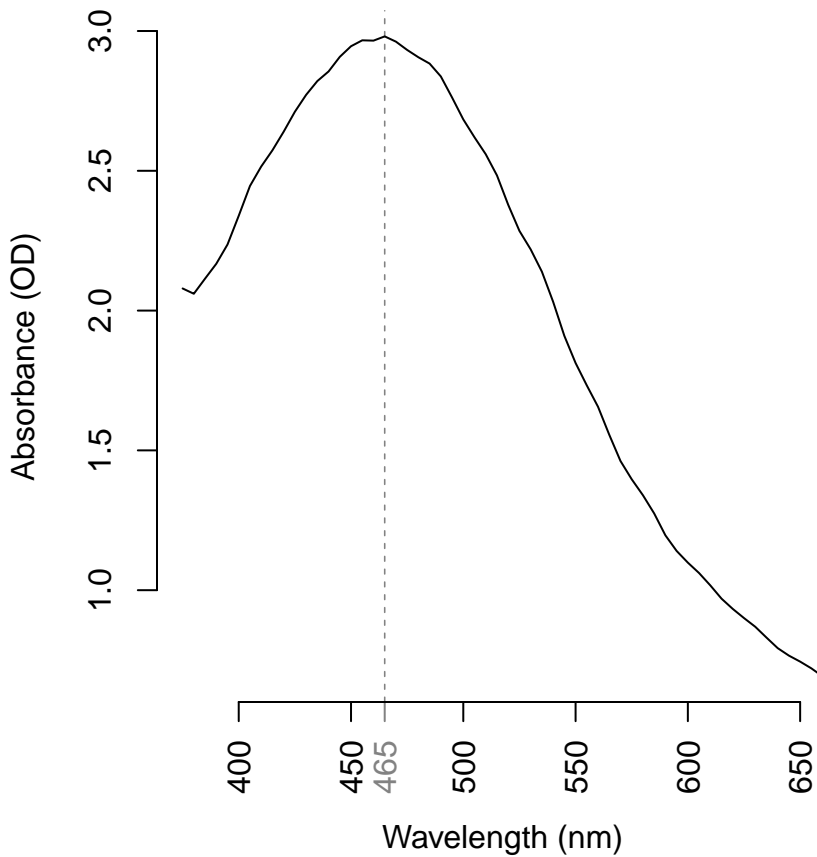

Supplement: 13071_2016_1319_MOESM1_ESM.pdf [file 13071_2016_1319_MOESM1_ESM.pdf]
